# Supplementary material for: Macrodomain-containing proteins are new mono-ADP-ribosylhydrolases
Source: Springer Nature journal article supplement (doi:10.1038/nsmb.2521), 2013-03-10
Supplement: 41594_2013_BFnsmb2521_MOESM9_ESM.pdf [file 41594_2013_BFnsmb2521_MOESM9_ESM.pdf]

*Nat. Struct. Mol. Biol.* 20, 502–507 (2013)

## Macrodomain-containing proteins are new mono-ADP-ribosylhydrolases

Florian Rosenthal, Karla L H Feijs, Emilie Frugier, Mario Bonalli, Alexandra H Forst, Ralph Imhof, Hans C Winkler, David Fischer, Amedeo Caflisch, Paul O Hassa, Bernhard Lüscher & Michael O Hottiger

In the version of this supplementary file originally posted online, Ile189 was incorrectly referred to as Ile89 in **Supplementary Figure 4e**. The error has been corrected in this file as of 3 April 2013.

**Supplementary material for:**

**Macrodomain-containing proteins are novel  
mono-ADP-ribosylhydrolases**

Florian Rosenthal, Karla L.H. Feijs, Emilie Frugier, Mario Bonalli, Alexandra H. Forst,  
Ralph Imhof, Hans C. Winkler, David Fischer, Amedeo Caflisch, Paul O.Hassa, Bernhard  
Lüscher and Michael O. Hottiger

## Supplementary Figure 1

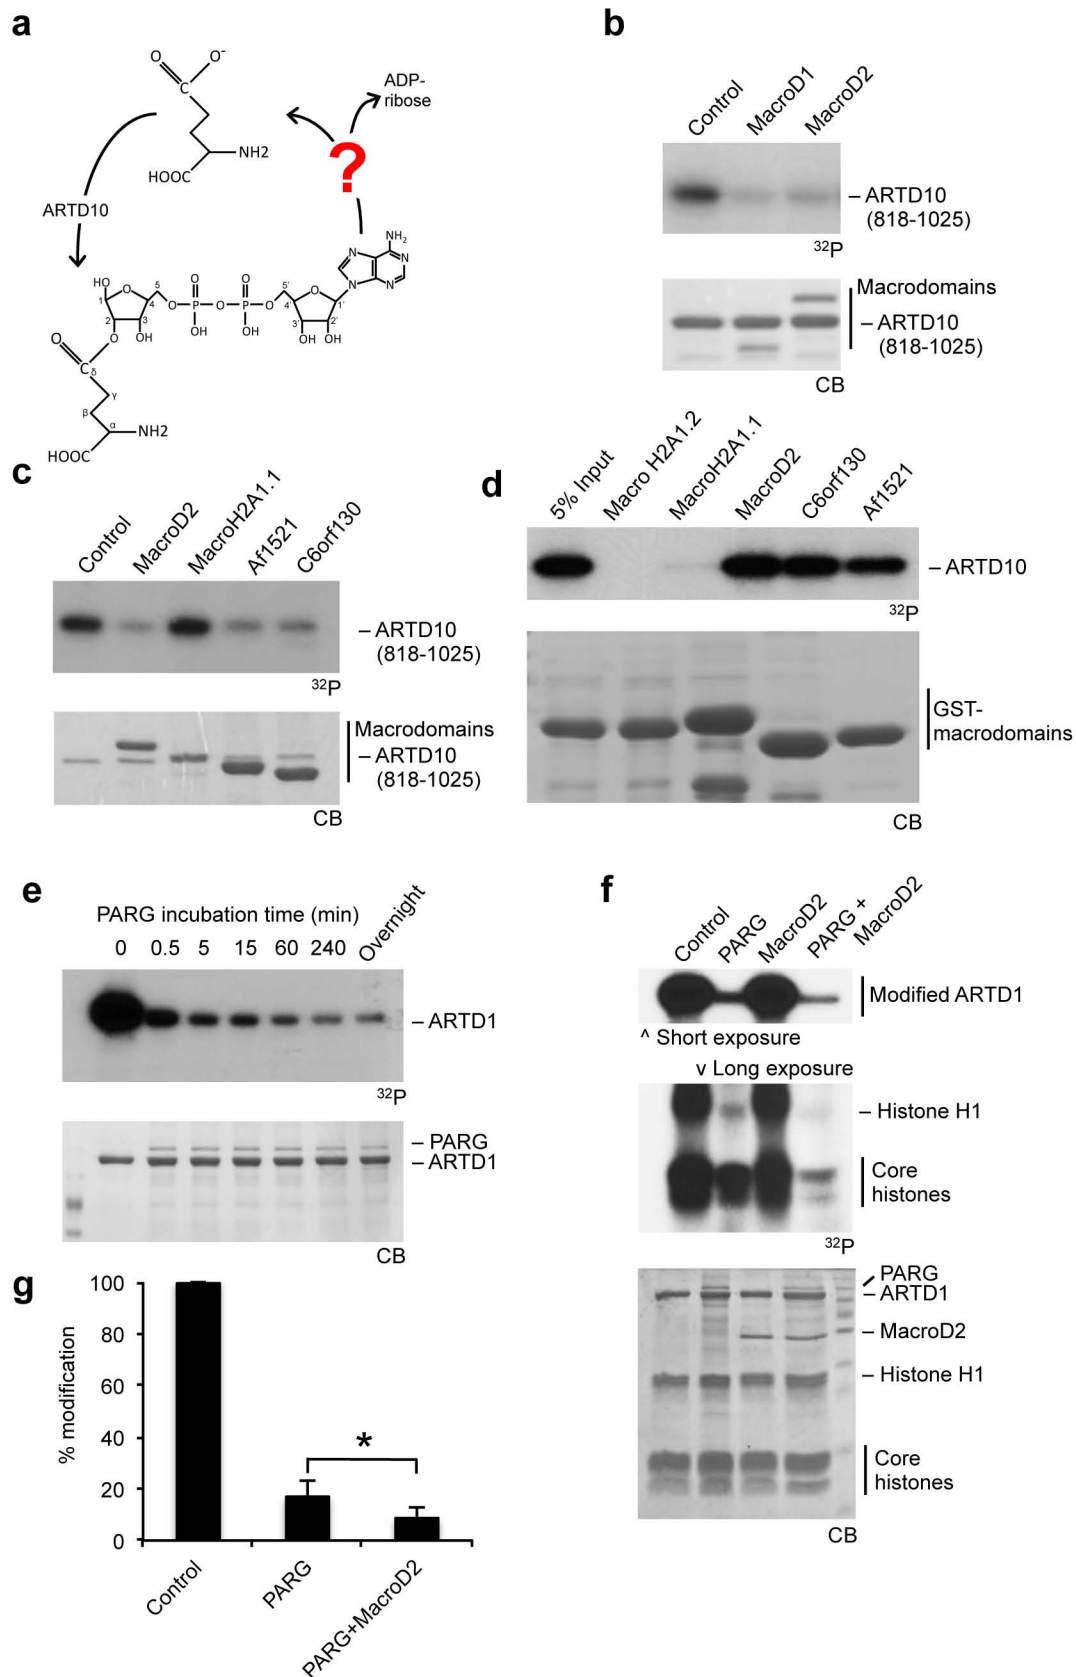

**Supplementary Figure 1. Macrodomain-containing proteins hydrolyze mono-ADP-ribose modifications.** (a) The missing link in the protein mono-ADP-ribosylglutamate modification cycle. (b-c) MacroD1, MacroD2, Af1521 and C6orf130 hydrolyze mono-ADP-ribosylated catalytic ARTD10 domain (residues 818-1025), while MacroH2A1.1 did not show activity. (d) ADP-ribose binding to different macrodomain proteins. Tagged macrodomain proteins were immobilized and incubated with automodified ARTD10. (e) Protein poly-ADP-ribose hydrolyzing activity of PARG. ARTD1 was auto-ADP-ribosylated *in vitro* with radioactive  $\text{NAD}^+$  and subjected to de-ADP-ribosylation assays with recombinant PARG for the indicated times. (f) PARG treatment renders proteins modified by ARTD1 under low  $\text{NAD}^+$  concentrations partly susceptible to hydrolysis by MacroD2. (g) MacroD2 further demodifies PARG treated ARTD1. ARTD1 was auto-poly-ADP-ribosylated and consecutively demodified either by PARG alone or by PARG and MacroD2. Three independent experiments were quantified and the results are shown relative to the untreated control (mean  $\pm$  SD). The effect of MacroD2 treatment on PARG treated samples was significant based on a paired t-test ( $p < 0.05$ ).

## Supplementary Figure 2

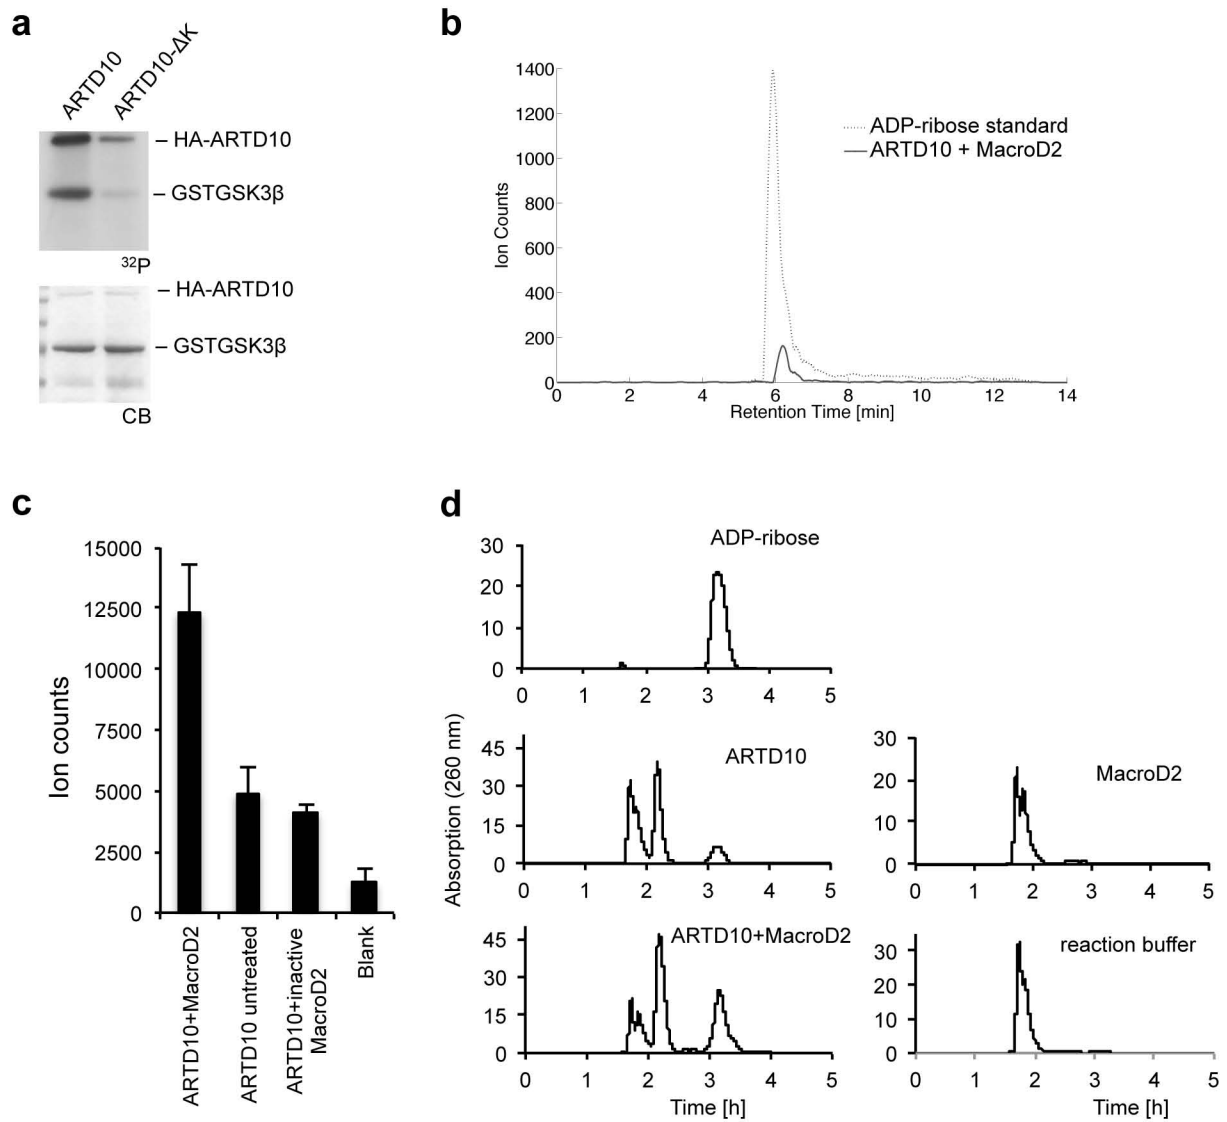

**Supplementary Figure 2. Identification of ADP-ribose as the product released by MacroD2 from auto-modified ARTD10.** (a) The ARTD10- $\Delta$ K mutant shows reduced ADP-ribosylation activity toward itself and GSK3 $\beta$ . (b) Extracted ion chromatograms of 558.064, monoisotopic mass of released ADP-ribose and ADP-ribose standard [M-H] adduct. Elution time window of ADP-Ribose can be observed between 6 and 7 minutes. (c) Relative amounts of ADP-ribose. MS scans in the elution time range of ADP-ribose were combined and the ion abundance of mass 558.064 is displayed. Error bars: standard deviation of three replicate LC-MS runs. (d) MacroD2 releases ADP-ribose from mono-ADP-ribosylated ARTD10 substrate. Reaction products were separated by HPLC on a RP C18 column and detected by measuring absorption at 260 nm.

## Supplementary Figure 3

**a**

```

macroH2A1.1 200 VQADIASI-D-S--DAVVHPTNTDFYIGGEVGNLTLEKKGKEF--VEA-VL-ELRK--KNGPLEVAG
MacroD1     157 LRSDITKL-E-V--DAIVNAANSSLLGGGGVDGCIHRAAGPLL--TDE-CR-TLQS--C----KTGK
MacroD2     75 YRGDITLL-E-V--DAIVNAANASLLGGGGVDGCIHRAAGPCL--LAE-CR-NLNG--C----DTGH
C6orf130    17 VKGDLFACPK-TDS--LAHCISED CRMGAGTAVLFK KFFGG----VQE-LL-NQK-----KSGE
Af1521      17 AQGDITQY-P-A--KAIVNAANKRLEHGGGVAYAIKACAGDAGLYTEISKKAMREQFGRDYIDHGE

macroH2A1.1 257 AAVSAGHGL-P----AKFVIHCNSPVW-GA----DKCEELEKTVKNCLALA-DDKKLKSIAFFPSIG
MacroD1     210 AKITGGYRL-P----AKYVIHTVGPPIA-YGEPs-ASQAAELRSCYLSLDDL-LEHRLRSVAFPCIS
MacroD2     128 AKITCGYDL-P----AKYVIHTVGPPIA-RGHIN-GSHKEDLANCYKSSLKLV-KENNIRSVAFPCIS
C6orf130    68 VAVLKR DG-----RYIYYLITKKR-ASH---KPTYENLQKSLEAMKSHC-LKNGVTDLSMPRIG
Af1521      80 VVVT PAMNL-EERG-IKYVFHTVGPIC-SGMWS-EELKEKLYKAF LGPLEKA-EMGVESIAFFAVS

```

**b**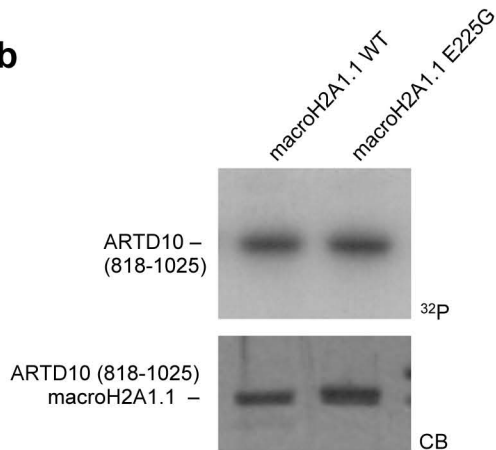**c**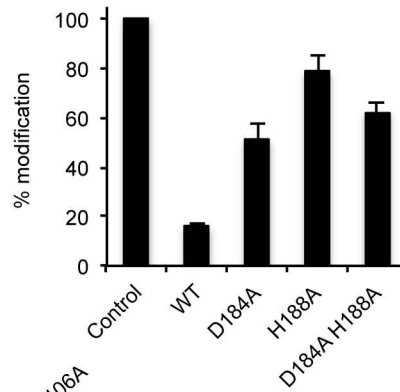**d**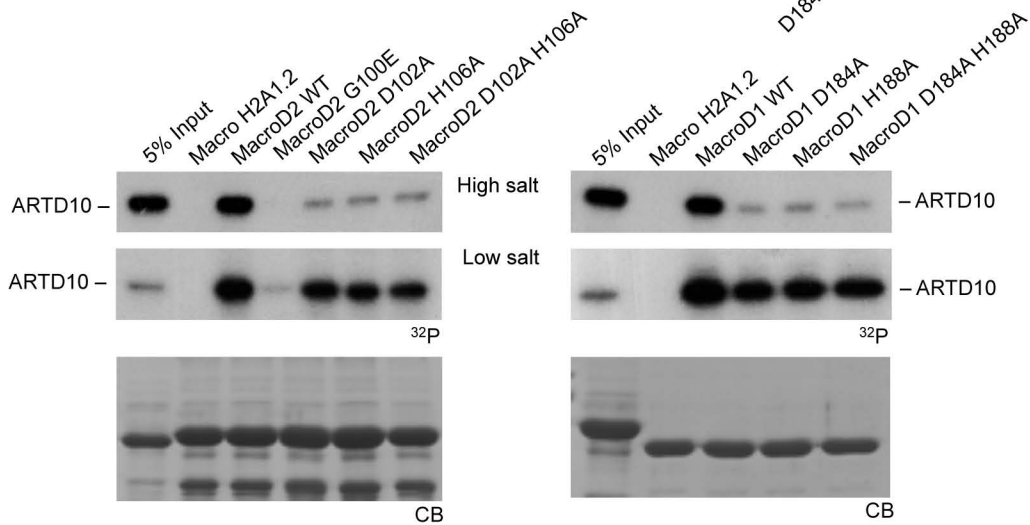

**Supplementary Figure 3. Identification of residues implicated in catalysis.**

(a) Sequence alignment of macrodomain containing proteins from *Homo sapiens* (macroH2A 1.1, MacroD1, MacroD2, C6orf130), and *Archaeoglobobolus fulgidus* (Af1521). Only the amino acids aligning to the residues 157 - 286 of the MacroD1 macrodomain are shown. (b) Mutation of E225 of macroH2A1.1 to a glycine does not restore mono-ADP-ribose hydrolyzing activity. (c) Mutational analysis of MacroD1 highlights residues implicated in enzymatic activity towards mono-ADP-ribosylated ARTD10 (818-1025). (d) ADP-ribose binding (under high and low salt conditions) to WT and mutant MacroD2 (left) or MacroD1 (right) was assessed with His- and GST-tagged, recombinantly expressed macrodomain proteins that were immobilized on glutathione or Nickel sepharose and incubated with automodified ARTD10.



## Supplementary Figure 4

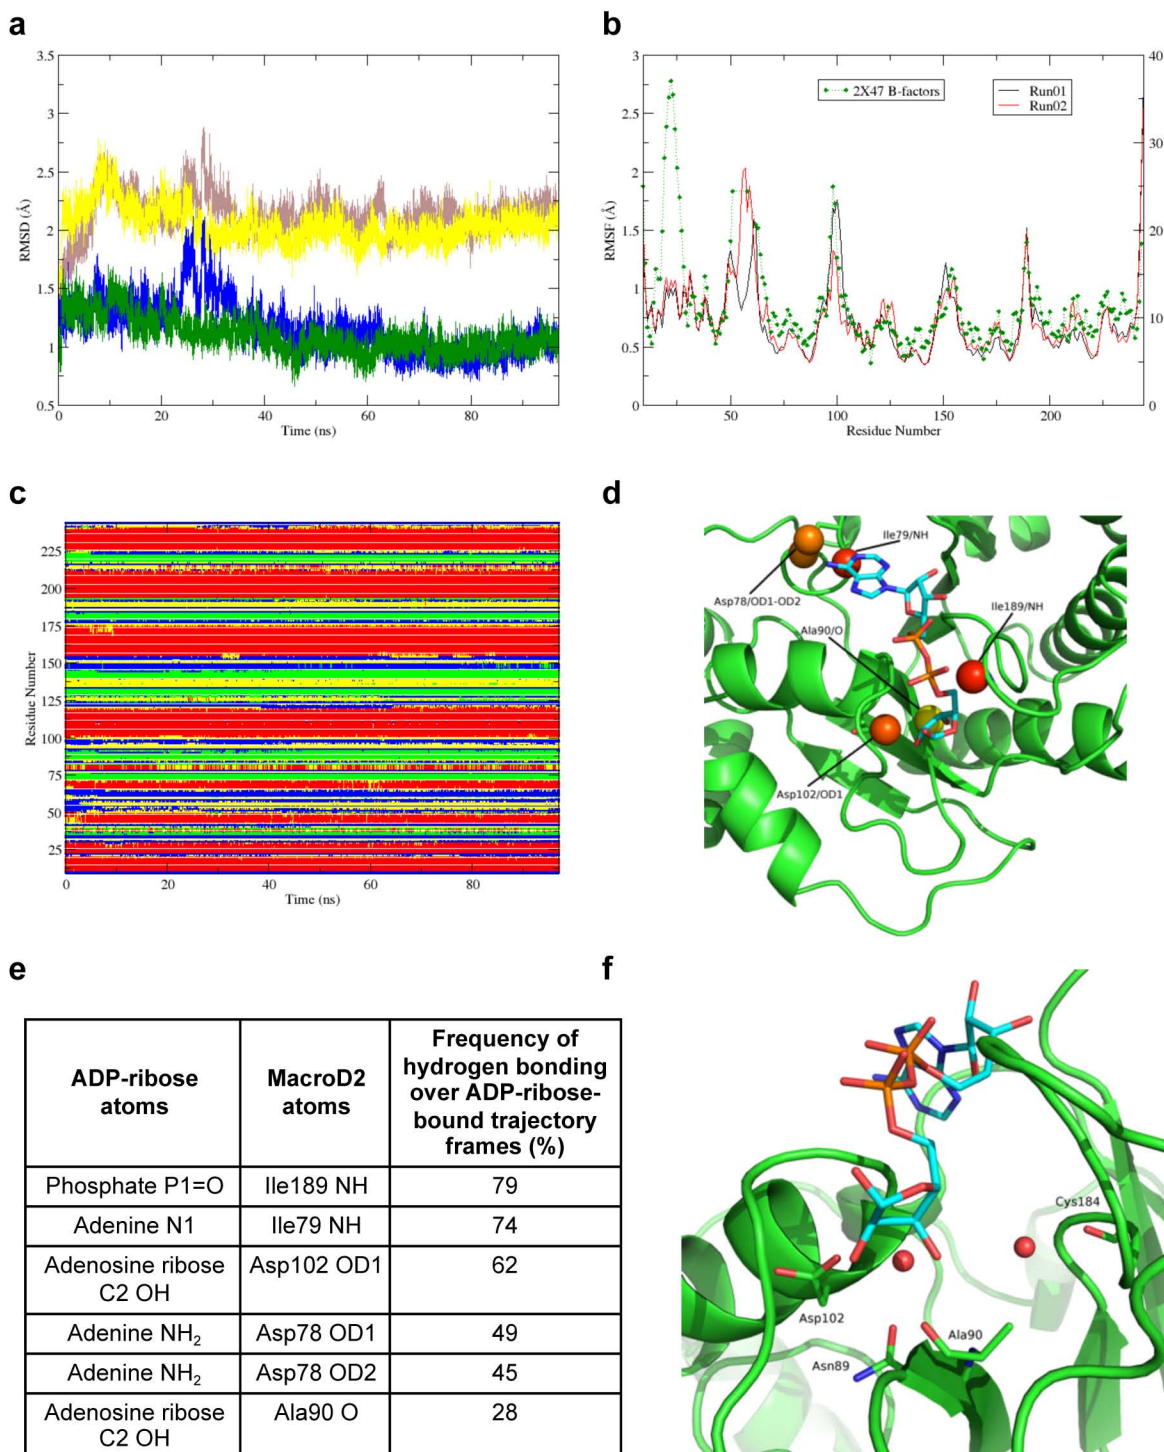

**Supplementary Figure 4. Validation of the MacroD2 homology model and docking and molecular dynamics simulations of ADP-ribose in MacroD2.** (a) Time evolution of C $\alpha$  atoms Root Mean Square Deviation (RMSD) from the MacroD2 homology model. Yellow and brown lines: C $\alpha$  atoms of residues having an RMSF value of less than 1 Å (shown in panel B) for independent molecular dynamics runs I and II, respectively. Green and blue lines: C $\alpha$  atoms of the putative binding site for independent molecular dynamics runs I and II, respectively. (b) C $\alpha$  atom Root Mean Square Fluctuations (RMSF) along the sequence of MacroD2 for molecular dynamics runs I (black) and II (red). B-Factors of template Human MacroD1 (PDB ID: 2X47) are shown in green. (c) Time evolution of secondary structure<sup>1,2</sup> of MacroD2 for molecular dynamics run I. Red:  $\alpha$ -helix. Green:  $\beta$ -sheet or  $\beta$ -bridge. Yellow: bend or helix-turn. Blue: loop. The secondary structure evolution was likewise stable for run II. (d) MacroD2 atoms participating in among frames in which ADP-ribose was in the binding site. Atoms are coloured on a red (high)-yellow (low) scale according to frequency of hydrogen bond occurrence. (e) Quantification of frequency of hydrogen-bonding of ADP-ribose to residues of MacroD2. (f) Water molecules close to ADP-ribose forming stable hydrogen-bonding interactions with residues of MacroD2.

**Supplementary note:****Homology modeling of MacroD2**

Modeling of the three-dimensional structure of residues 9 to 244 of the human MacroD2 protein was undertaken using Modeller (version 9.10) <sup>3-6</sup>. As template, the coordinates of residues 90 to 325 of apo human MacroD1 (PDB ID: 2X47) were selected following alignment of the FASTA sequences of these residues (UniProt ID: Q9BQ69) and residues 9 to 244 of human MacroD2 (UniProt ID: A1Z1Q3) using CLUSTAL O version 1.1.0 on UniProt <sup>7</sup>, giving an identity of 53.6%.

The MacroD2 homology model having the lowest Discrete Optimized Protein Energy assessment score <sup>8</sup> was subject to steepest-descent minimisation and explicit-water molecular dynamics (MD) simulations using GROMACS <sup>9</sup> (version 4.5.4) with the CHARMM22 force field <sup>10</sup> and TIP3P water model <sup>11</sup>. Aspartate and glutamate side-chains were negatively charged and those of lysines and arginines were positively charged, while histidines were maintained as neutral. The N-terminus of the protein was acetylated and the C-terminus N-methyl amidated. The protein was immersed in an orthorhombic box of pre-equilibrated water molecules having a minimal distance of 12 Å between the boundary and any protein atom. Sodium and chloride ions were added to the systems for an ion concentration of 150 mM.

The van der Waals and short-range electrostatic interactions were determined up to a cutoff of 10 Å. Periodic boundary conditions were applied and long-range electrostatic interactions were evaluated using the particle-mesh Ewald summation method <sup>12</sup>. MD simulations were performed in the NPT-ensemble at constant temperature (310 K) using the modified Berendsen thermostat, and constant pressure (1 atm) using the Parrinello-Rahman barostat <sup>13</sup>. Covalent bonds involving hydrogen atoms were constrained using the Linear Constraint Solver algorithm <sup>14</sup> and the time-step was 2 fs.

## References

- 1 Andersen, C. A., Palmer, A. G., Brunak, S. & Rost, B. Continuum secondary structure captures protein flexibility. *Structure* **10**, 175-184, (2002).
- 2 Carter, P., Andersen, C. A. & Rost, B. DSSPcont: Continuous secondary structure assignments for proteins. *Nucleic Acids Res* **31**, 3293-3295, (2003).
- 3 Eswar, N. *et al.* Comparative protein structure modeling using Modeller. *Current Protoc Bioinformatics* **Chapter 5**, Unit 5 6, (2006).
- 4 Marti-Renom, M. A. *et al.* Comparative protein structure modeling of genes and genomes. *Annu Rev Biophys Biomol Struct* **29**, 291-325, (2000).
- 5 Sali, A. & Blundell, T. L. Comparative protein modelling by satisfaction of spatial restraints. *J Mol Biol* **234**, 779-815, (1993).
- 6 Fiser, A., Do, R. K. & Sali, A. Modeling of loops in protein structures. *Protein Sci* **9**, 1753-1773, (2000).
- 7 Reorganizing the protein space at the Universal Protein Resource (UniProt). *Nucleic Acids Res* **40**, D71-75, (2012).
- 8 Shen, M. Y. & Sali, A. Statistical potential for assessment and prediction of protein structures. *Protein Sci* **15**, 2507-2524, (2006).
- 9 Hess, B., Kutzner, C., van der Spoel, D. & E., L. GROMACS 4: Algorithms for Highly Efficient, Load-Balanced, and Scalable Molecular Simulation. *J Chem Theory Comput.* **4**, 435-447, (2008).
- 10 MacKerell, A. D. *et al.* All-Atom Empirical Potential for Molecular Modeling and Dynamics Studies of Proteins†. *J Physical Chem B* **102**, 3586-3616, (1998).
- 11 Jorgensen, W. L., Chandrasekhar, J., Madura, J. D., Impey, R. W. & Klein, M. L. Comparison of simple potential functions for simulating liquid water. *J Chem Phys* **79**, 926-935, (1983).
- 12 Essmann, U. *et al.* A smooth particle mesh Ewald method. *J Chem Phys* **103**, 8577, (1995).
- 13 Parrinello, M. & Rahman, A. Polymorphic transitions in single crystals: A new molecular dynamics method. *J Appl Phys* **52**, 7182, (1981).
- 14 Hess, B., Bekker, H., Berendsen, H. J. C. & Fraaije, J. G. E. M. LINCS: A linear constraint solver for molecular simulations. *J Comput Chem.* **18**, 1463-1472, (1997).
